# Supplementary material for: Autophagy activation and SREBP‐1 induction contribute to fatty acid metabolic reprogramming by leptin in breast cancer cells
Source: PubMed Central journal article supplement (PMC7858107; doi:10.1002/1878-0261.12860), 2020-12-05
Supplement: MOL2-15-657-s004.pdf [file MOL2-15-657-s004.pdf]

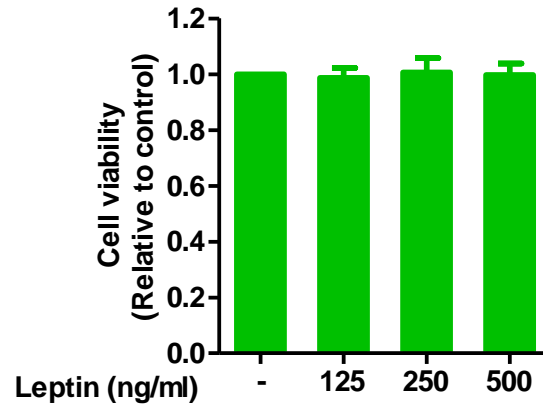

**Fig. S4.** *The effect of leptin on cell viability of MDA-MB-231 breast cancer cells.* MDA-MB-231 cells were treated with different concentrations of leptin for 48 h followed by MTS assay as described in Methods.
